# Supplementary material for: Efficient photoelectrocatalytic performances using a WO 3 /BiVO 4 heterojunction photoanode: applied bias-promoted photoinduced charge transfer and separation
Source: Royal Society of Chemistry journal article supplement (doi:10.1039/d5cp01826a), 2025-01-01
Supplement: d5cp01826a1.pdf [file d5cp01826a1.pdf]

## Electronic supplementary information for

### Efficient photoelectrocatalytic performances with WO<sub>3</sub>/BiVO<sub>4</sub> heterojunction photoanode: applied bias-promoted photoinduced charge transfer and separation

Yunni Liu,<sup>a</sup> Yuna Kang,<sup>a</sup> Zhenyi Zhang<sup>b</sup> and Jun Lin<sup>\*a</sup>

<sup>a</sup> School of Chemistry and Life Resources, Renmin University of China, Beijing 100872, P. R. China.

\*Email: [jlin@ruc.edu.cn](mailto:jlin@ruc.edu.cn)

<sup>b</sup> Key Laboratory of New Energy and Rare Earth Resource Utilization of State Ethnic Affairs Commission, Key Laboratory of Photosensitive Materials & Devices of Liaoning Province, School of Physics and Materials Engineering, Dalian Minzu University, Dalian 116600, P. R. China.

#### 1. Calculation of the applied bias photon to current efficiency (ABPE)<sup>1,2</sup>

The applied bias photon to current efficiency (ABPE) is calculated from the LSV curve to assess the PEC performance of different photoanodes using the following equation:

$$ABPE = \frac{J_{ph} (1.23 - V)}{P_{light}} \quad (1)$$

where  $J_{ph}$  represents the photocurrent density,  $V$  is the applied bias,  $P_{light}$  is the power density of the incident light.

#### 2. Calculation of charge separation and charge injection efficiencies<sup>3-6</sup>

The photocurrent density generated by PEC water oxidation can be described by the following formula:

$$J_{PEC} = J_{absorbed} \times P_{charge\ separation} \times P_{charge\ injection} \quad (2)$$

where  $J_{absorbed}$  represents the photocurrent density generated by the complete conversion of the absorbed irradiation absorbed by the material, which is constant with fixed semiconductor photocatalyst and lighting source.  $J_{absorbed}$  can be calculated using the following equation:

$$J_{absorbed} = J_{max} \times LHE \quad (3)$$

where LHE is light-harvesting efficiency ( $LHE = 1 - 10^{-A(\lambda)}$ ,  $A(\lambda)$  is the absorbance at specific wavelength  $\lambda$ ), and  $J_{max}$  is the maximum photocurrent density achievable assuming 100% IPCE for photons with higher

energy than the bandgap of the photoanode. This was performed by the conversion of a 300 W xenon lamp (LabSolar II, Perfect Light Co., Ltd) equipped with a UV-cutoff filter ( $\lambda \geq 420$  nm) from radiation energy ( $\text{W m}^{-2} \text{ nm}^{-1}$ ) to number of photons ( $\text{s}^{-1} \text{ cm}^{-2} \text{ nm}^{-1}$ ) using the Equation (4) for each wavelength:

$$\text{number of photons} = \left( \frac{\text{radiation energy}}{\left( \frac{c \times h}{\lambda} \right)} \right) \times \frac{1 \text{ m}^2}{10000 \text{ cm}^2} \quad (4)$$

where radiation energy is the energy for each wavelength in the reference spectrum (unity in  $\text{W m}^{-2} \text{ nm}^{-1}$ ).  $c$  is  $2.99 \times 10^8 \text{ m s}^{-1}$  (speed of light in a vacuum).  $h$  is  $6.63 \times 10^{-34} \text{ J s}$  (Planck constant) and  $\lambda$  is the wavelength of photon (unity in m).

Next, the number of photons is converted to mol of photons using the Equation (5):

$$\text{mol of photons} = \text{number of photons} / N_A \quad (5)$$

where  $N_A$  is  $6.022 \times 10^{23}$  (Avogadro constant). Then, the mol of photons is converted to current (mA) using the Equation (6):

$$\text{current (mA)} = (\text{mol of photons}) \times F \times 1000 \quad (6)$$

in which  $F$  is  $96485.33 \text{ C mol}^{-1}$  and 1000 is a constant to result the unity at  $\text{mA cm}^{-2} \text{ nm}^{-1}$ .

In this way, the theoretical maximum photocurrent density  $J_{\text{max}}$  was determined by trapezoidal integration of the photocurrent spectrum ( $\text{mA cm}^{-2} \text{ nm}^{-1}$ ) as a function of wavelength (nm) above the optical bandgap of the photoanodes. The bandgaps of  $\text{WO}_3$  and  $\text{WO}_3/\text{BiVO}_4$ -15 were determined by diffuse reflectance spectroscopy (DRS) to be 2.70 eV and 2.55 eV, respectively. Base on the experimental data (**Fig. S9**), the  $J_{\text{absorbed}}$  was calculated to be  $7.55 \text{ mA cm}^{-2}$  for  $\text{WO}_3$  and  $10.02 \text{ mA cm}^{-2}$  for  $\text{WO}_3/\text{BiVO}_4$ -15.

Moreover,  $P_{\text{charge separation}}$  is the charge separation yield of the photogenerated charge carriers.  $P_{\text{charge injection}}$  is the charge injection yield from electrode to electrolyte, reflecting the efficiency of water oxidation process. This equation describes energy losses occurring at different stages of the PEC water oxidation reaction. To evaluate the efficiency of each process, the widely used hole scavenger  $\text{Na}_2\text{SO}_3$  (0.1 M) was added to the electrolyte (0.5 M  $\text{Na}_2\text{SO}_4$ ) to completely consume the holes accumulated on the surface. By this way, the charge injection efficiency was assumed to be 100%, allowing for the precise determination of charge separation efficiency. As described above:

$$J_{\text{Na}_2\text{SO}_3} = J_{\text{absorbed}} \times P_{\text{charge separation}} \quad (7)$$

Therefore, the charge separation efficiency can be calculated as follows:

$$P_{\text{charge separation}} = J_{\text{Na}_2\text{SO}_3} / J_{\text{absorbed}} \quad (8)$$

$$P_{\text{charge injection}} = J_{\text{PEC}} / J_{\text{Na}_2\text{SO}_3} \quad (9)$$

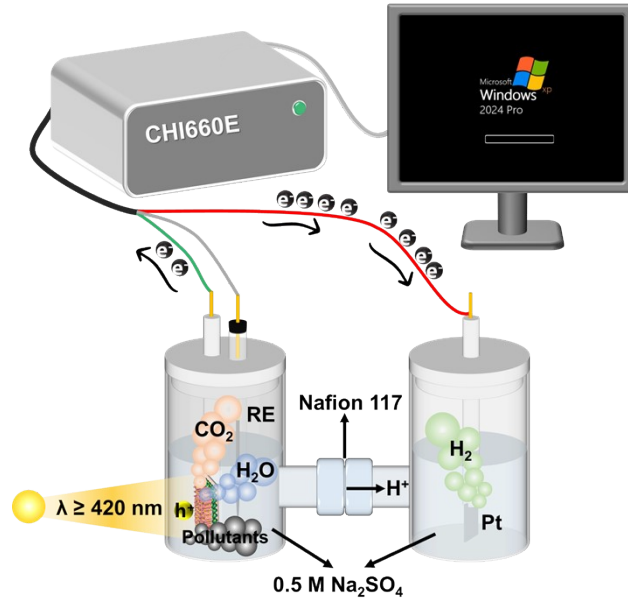

**Fig. S1** Schematic illustration for PEC system using the  $\text{WO}_3/\text{BiVO}_4$ -15 photoanode.

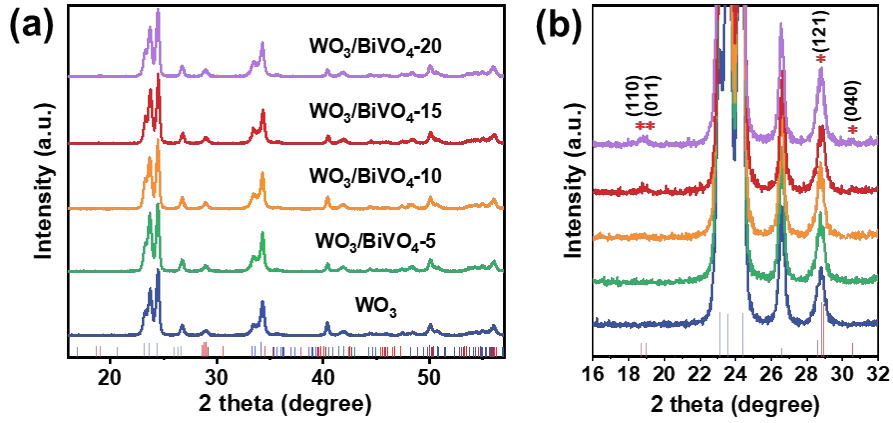

**Fig. S2** (a) Wide-angle XRD patterns and (b) magnified XRD patterns in the range of 16–32°.

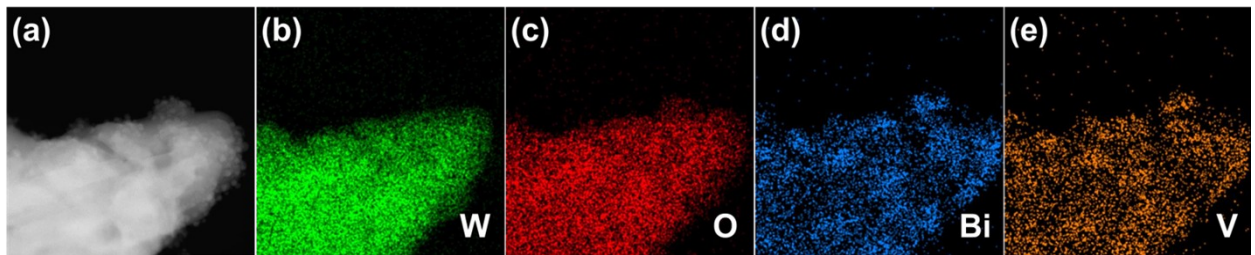

**Fig. S3** (a) TEM image of  $\text{WO}_3/\text{BiVO}_4$ -15 for TEM-EDS mapping and the corresponding EDS element maps of

(b) W, (c) O, (d) Bi, (e) V, respectively.

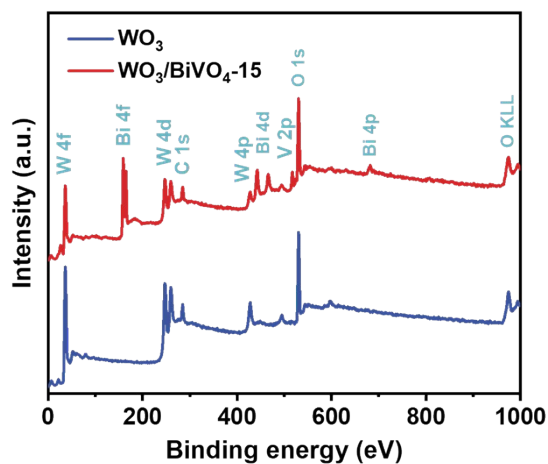

Fig. S4 XPS survey spectra of  $\text{WO}_3$  and  $\text{WO}_3/\text{BiVO}_4$ -15.

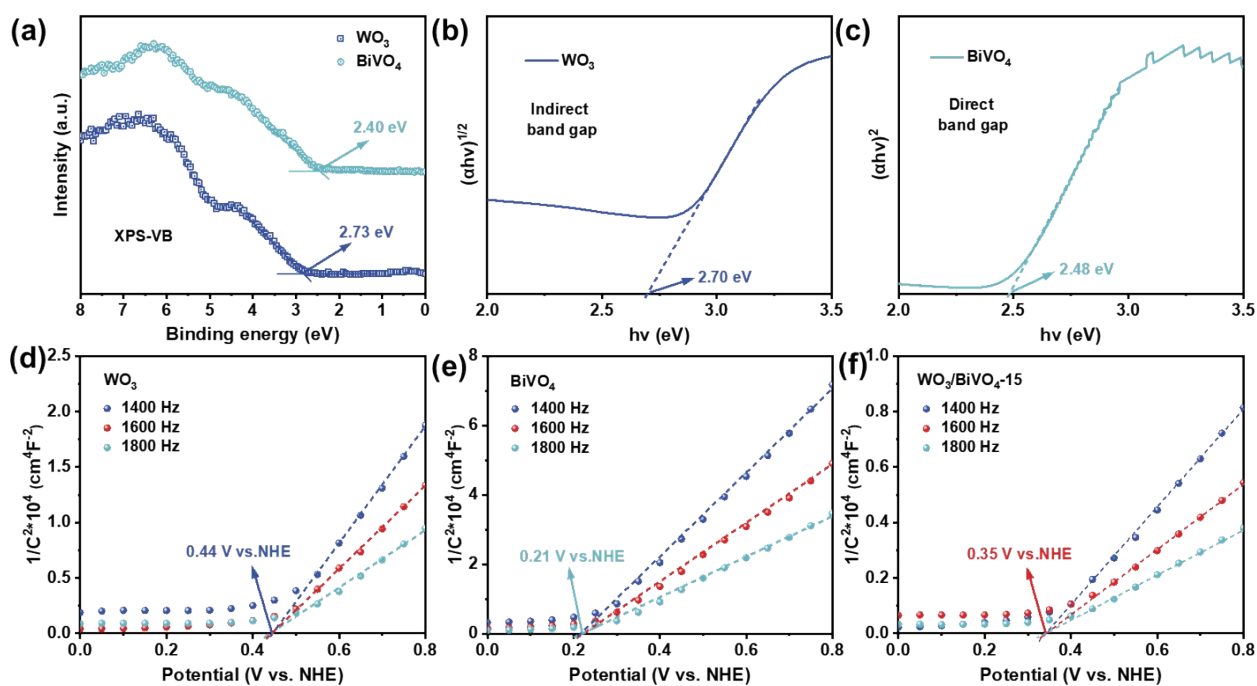

Fig. S5 (a) XPS-VB spectra. (b-c) Tauc plots of  $\text{WO}_3$  and  $\text{BiVO}_4$ . (d-f) Mott-Schottky plots of  $\text{WO}_3$ ,  $\text{BiVO}_4$  and  $\text{WO}_3/\text{BiVO}_4$ -15 photoanodes measured at fixed frequencies of 1400, 1600 and 1800 Hz.

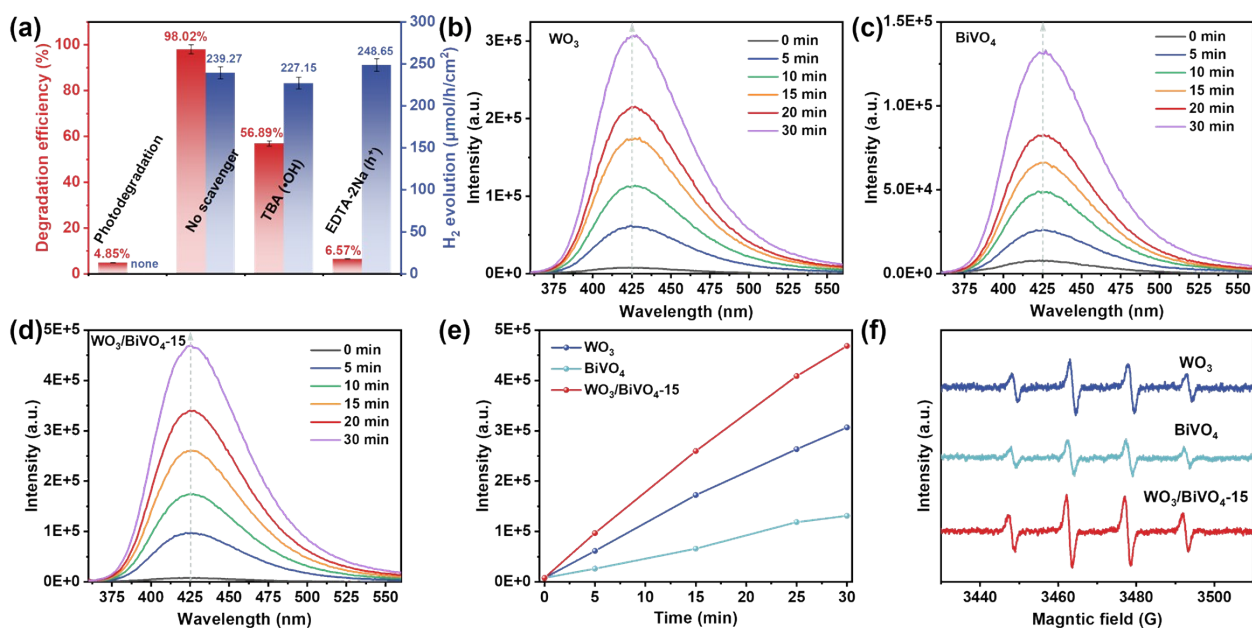

**Fig. S6** (a) PEC performances for RhB degradation coupled with simultaneous cathodic H<sub>2</sub> evolution using the WO<sub>3</sub>/BiVO<sub>4</sub>-15 photoanode in the presence of different scavengers. (b-e) PL spectra of the reaction solution for WO<sub>3</sub>, BiVO<sub>4</sub> and WO<sub>3</sub>/BiVO<sub>4</sub>-15 photoanodes with increasing PEC reaction time (excitation at 315 nm). (f) ESR spectra obtained with DMPO as a trapping agent after 1 h reaction for WO<sub>3</sub>, BiVO<sub>4</sub> and WO<sub>3</sub>/BiVO<sub>4</sub>-15 photoanodes in PEC process.

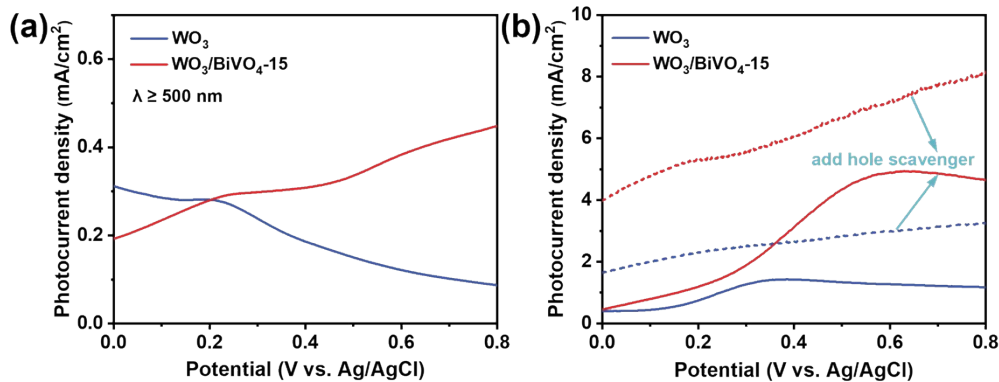

**Fig. S7.** (a) LSV curves of WO<sub>3</sub> and WO<sub>3</sub>/BiVO<sub>4</sub>-15 photoanodes measured in 0.5 M Na<sub>2</sub>SO<sub>4</sub> electrolyte under visible-light irradiation (λ ≥ 500 nm). (b) LSV curves measured in 0.5 M Na<sub>2</sub>SO<sub>4</sub> electrolyte under visible-light irradiation (λ ≥ 420 nm) with and without a hole scavenger.

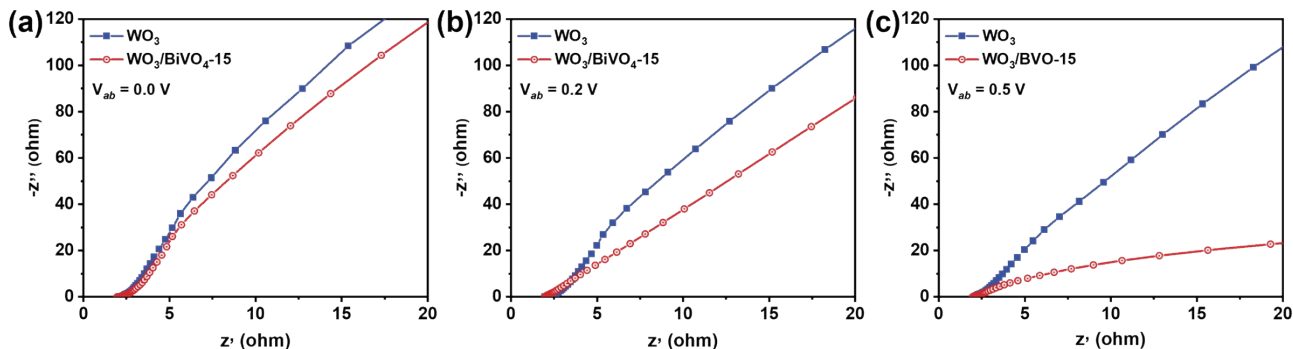

**Fig. S8** (a), (b), and (c) EIS spectra of  $\text{WO}_3$  and  $\text{WO}_3/\text{BiVO}_4\text{-15}$  photoanodes under different applied bias potentials.

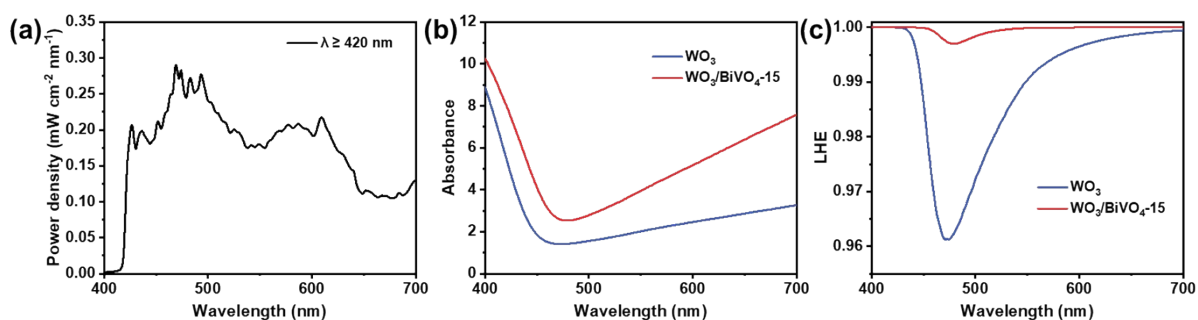

**Fig. S9** (a) Visible-light irradiation spectrum of a 300 W xenon lamp equipped with a UV-cutoff filter ( $\lambda \geq 420$  nm) showing the power density ( $\text{mW cm}^{-2} \text{ nm}^{-1}$ ) as a function of wavelength. (b-c) UV-vis absorption spectra and light harvesting efficiencies of  $\text{WO}_3$  and  $\text{WO}_3/\text{BiVO}_4\text{-15}$  photoanodes.

**Table S1.** Comparison of our work with the recent  $\text{WO}_3$  heterojunction photoanodes in PEC system.

| Photoanode                                                                                                           | Electrolyte                    | Photocurrent                            | $\text{H}_2$ and $\text{O}_2$ evolution/<br>Pollutants removal                              | References |
|----------------------------------------------------------------------------------------------------------------------|--------------------------------|-----------------------------------------|---------------------------------------------------------------------------------------------|------------|
| Surface dispersed $\text{BiVO}_4/\text{WO}_3$ nanoplates                                                             | 0.2 M KPi buffer Solution      | 3.53 $\text{mA/cm}^2$ at 1.23 V vs. RHE | $\text{H}_2$ : -<br>$\text{O}_2$ : -                                                        | 7          |
| $\text{WO}_3/\text{BiVO}_4/\text{OER}$ ( $\text{FeOOH}/\text{NiOOH}$ )                                               | 0.5 M $\text{Na}_2\text{SO}_3$ | 5.0 $\text{mA/cm}^2$ at 1.23 V vs. RHE  | $\text{H}_2$ : 145 $\mu\text{mol/cm}^2$<br>$\text{O}_2$ : 70 $\mu\text{mol/cm}^2$ (120 min) | 8          |
| F:FeOOH/ $\text{BiVO}_4/\text{WO}_3$                                                                                 | 0.1 M KPi buffer solution      | 3.1 $\text{mA/cm}^2$ at 1.23 V vs. RHE  | $\text{H}_2$ : -<br>$\text{O}_2$ : -                                                        | 9          |
| $\text{WO}_3$ with hexagonal-monoclinic heterophase junction supported on W mesh (hm-m- $\text{WO}_3/\text{W}$ mesh) | 0.1 M $\text{Na}_2\text{SO}_4$ | 5.6 $\text{mA/cm}^2$ at 1.2 V vs. RHE   | 99.9% of 20 ppm BPA;<br>60.9% of TOC (150 min)                                              | 10         |

|                                                                                                 |                                                                               |                                              |                                                                                    |          |
|-------------------------------------------------------------------------------------------------|-------------------------------------------------------------------------------|----------------------------------------------|------------------------------------------------------------------------------------|----------|
| CoOOH/WO <sub>3</sub>                                                                           | 0.1 M Na <sub>2</sub> SO <sub>4</sub>                                         | 3.2 mA/cm <sup>2</sup> at 1.2 V vs. RHE      | 99.9% of 20 ppm 4-FP;<br>75.8 % of TOC<br>(150 min)                                | 11       |
| WO <sub>3</sub> /CdS/Co-Pi                                                                      | 0.1 M phosphate buffer solution + 0.5 M Na <sub>2</sub> SO <sub>3</sub>       | 5.85 mA/cm <sup>2</sup> at 1.23 V vs. RHE    | H <sub>2</sub> : -<br>O <sub>2</sub> : -                                           | 12       |
| Mo:BiVO <sub>4</sub> nanoparticle-coated WO <sub>3</sub>                                        | 0.5 M Na <sub>2</sub> SO <sub>4</sub> + 0.1 M Na <sub>2</sub> SO <sub>3</sub> | 5.8 mA/cm <sup>2</sup> at 1.23 V vs. RHE     | H <sub>2</sub> : -<br>O <sub>2</sub> : -                                           | 13       |
| CoP/BiVO <sub>4</sub> :WO <sub>3</sub>                                                          | 0.5 M Na <sub>2</sub> SO <sub>4</sub>                                         | 2.81 mA/cm <sup>2</sup> at 1.23 V vs. RHE    | H <sub>2</sub> : -<br>O <sub>2</sub> : -                                           | 14       |
| WO <sub>3</sub> /BiVO <sub>4</sub> /NiOOH                                                       | 2 M sodium borate (NaBi)                                                      | 3.0 mA/cm <sup>2</sup> at 1.23 V vs. RHE     | H <sub>2</sub> : -<br>O <sub>2</sub> : -                                           | 15       |
| WO <sub>3</sub> /BiVO <sub>4</sub> core-shell hetero-nanostructure                              | 0.5 M phosphate buffer (pH 7) with 1 M Na <sub>2</sub> SO <sub>3</sub>        | 4.15 mA/cm <sup>2</sup> at 1.23 V vs. RHE    | H <sub>2</sub> : -<br>O <sub>2</sub> : -                                           | 16       |
| (WO <sub>3</sub> /BiVO <sub>4</sub> )-OV/CoPi                                                   | 0.1 M Na <sub>2</sub> SO <sub>4</sub> and 0.1 M KPi                           | 2.3 mA/cm <sup>2</sup> at 1.23 V vs. RHE     | H <sub>2</sub> : -<br>O <sub>2</sub> : -                                           | 17       |
| Cobalt-phosphate (Co-Pi) co-catalyst decorated WO <sub>3</sub> /Mo-BiVO <sub>4</sub> photoanode | 0.5 M K <sub>2</sub> SO <sub>4</sub>                                          | 5.38 mA/cm <sup>2</sup> at 1.23 V vs. RHE    | H <sub>2</sub> : -<br>O <sub>2</sub> : -                                           | 18       |
| WO <sub>3</sub> /BiVO <sub>4</sub> -15                                                          | 0.5 M Na <sub>2</sub> SO <sub>4</sub>                                         | 4.46 mA/cm <sup>2</sup> at 0.5 V vs. Ag/AgCl | H <sub>2</sub> : 258.98 μmol/h/cm <sup>2</sup><br>99.34 % of 10 ppm RhB ( 60 min ) | Our work |

## References

- 1 M. Tayebi, Z. Masoumi, M. Kolaei, A. Tayyebi, M. Tayebi, B. Seo, C.-S. Lim, H.-G. Kim and B.-K. Lee, *Chem. Eng. J.*, 2022, **446**, 136830.
- 2 F. Lin, Y.-Y. Gu, H. Li, S. Wang, X. Zhang, P. Dong, S. Li, Y. Wang, R. Fu, J. Zhang, C. Zhao and H. Sun, *Sci. Total Environ.*, 2021, **796**, 148931.
- 3 D. Coelho, J. P. R. S. Gaudêncio, S. A. Carminati, F. W. P. Ribeiro, A. F. Nogueira and L. H. Mascaro, *Chem. Eng. J.*, 2020, **399**, 125836.
- 4 R. Zhang, F. Ning, S. Xu, L. Zhou, M. Shao and M. Wei, *Electrochim. Acta*, 2018, **274**, 217-223.
- 5 K. Li, Y. Yin and P. Diao, *Small*, 2024, **20**, 2402474.
- 6 K.-H. Ye, Z. Wang, J. Gu, S. Xiao, Y. Yuan, Y. Zhu, Y. Zhang, W. Mai and S. Yang, *Energy Environ. Sci.*,

2017, **10**, 772-779.

- 7 X. Fan, Q. Chen, F. Zhu, T. Wang, B. Gao, L. Song and J. He, *Molecules*, 2024, **29**, 372.
- 8 B. Jin, E. Jung, M. Ma, S. Kim, K. Zhang, J. I. Kim, Y. Son and J. H. Park, *J. Mater. Chem. A*, 2018, **6**, 2585-2592.
- 9 Y. Li, Q. Mei, Z. Liu, X. Hu, Z. Zhou, J. Huang, B. Bai, H. Liu, F. Ding and Q. Wang, *Appl. Catal. B Environ. Energy*, 2022, **304**, 120995.
- 10 Q. Ma, R. Song, F. Ren, H. Wang, W. Gao, Z. Li and C. Li, *Appl. Catal. B Environ. Energy*, 2022, **309**, 121292.
- 11 Q. Ma, Z. Ning, M. Fang, G. Zhang, H. Guo, J. Zhou and T. Wang, *Chem. Eng. J.*, 2024, **498**, 155551.
- 12 J. Sun, L. Sun, X. Yang, S. Bai, R. Luo, D. Li and A. Chen, *Electrochim. Acta.*, 2020, **331**, 135282.
- 13 K. Kim, S. K. Nam, J. H. Park and J. H. Moon, *J. Mater. Chem. A*, 2019, **7**, 4480-4485.
- 14 N. D. Quang, P. C. Van, S. Majumder, J.-R. Jeong, D. Kim and C. Kim, *J. Alloys Compd.*, 2022, **899**, 163292.
- 15 W. Fang, Y. Lin, R. Xv and L. Fu, *ACS Appl. Energy Mater.*, 2022, **5**, 11402-11412.
- 16 B. R. Lee, M. G. Lee, H. Park, T. H. Lee, S. A. Lee, S. S. M. Bhat, C. Kim, S. Lee and H. W. Jang, *ACS Appl. Mater. Interfaces*, 2019, **11**, 20004-20012.
- 17 J. Liu, W. Chen, Q. Sun, Y. Zhang, X. Li, J. Wang, C. Wang, Y. Yu, L. Wang and X. Yu, *ACS Appl. Energy Mater.*, 2021, **4**, 2864-2872.
- 18 Q. Zeng, J. Li, L. Li, J. Bai, L. Xia and B. Zhou, *Appl. Catal. B Environ. Energy*, 2017, **217**, 21-29.
